# Supplementary material
Source: PubMed Central journal article supplement (PMC4483277)
Supplement: NIHMS696901-supplement-Appendix_1-3.pdf [file NIHMS696901-supplement-Appendix_1-3.pdf]

## Appendix 1. Search history for (a) PubMed/MEDLINE, (b) EMBASE, and (c) Cochrane Central.

### a) PubMed

```

((((("risk"[MeSH Terms] OR "risk"[All Fields]) AND stratification[All
Fields]) OR ("risk assessment"[MeSH Terms] OR ("risk"[All Fields] AND
"assessment"[All Fields]) OR "risk assessment"[All Fields]) OR ("risk
factors"[MeSH Terms] OR ("risk"[All Fields] AND "factors"[All Fields]) OR
"risk factors"[All Fields]) OR ("prognosis"[MeSH Terms] OR "prognosis"[All
Fields]) OR ("risk"[MeSH Terms] OR "risk"[All Fields])) AND (("neoplasm
staging"[MeSH Terms] OR ("neoplasm"[All Fields] AND "staging"[All Fields])
OR "neoplasm staging"[All Fields]) OR ("neoplasm grading"[MeSH Terms] OR
("neoplasm"[All Fields] AND "grading"[All Fields]) OR "neoplasm
grading"[All Fields]) OR ("biological tumour markers"[All Fields] OR
"tumor markers, biological"[MeSH Terms] OR ("tumor"[All Fields] AND
"markers"[All Fields] AND "biological"[All Fields]) OR "biological tumor
markers"[All Fields] OR ("biological"[All Fields] AND "tumor"[All Fields]
AND "markers"[All Fields])) OR ("nomograms"[MeSH Terms] OR "nomograms"[All
Fields]) OR ("prostate-specific antigen"[MeSH Terms] OR
("prostate-specific"[All Fields] AND "antigen"[All Fields]) OR
"prostate-specific antigen"[All Fields] OR ("prostate"[All Fields] AND
"specific"[All Fields] AND "antigen"[All Fields]) OR "prostate specific
antigen"[All Fields]) OR ("polymorphism, single nucleotide"[MeSH Terms] OR
("polymorphism"[All Fields] AND "single"[All Fields] AND "nucleotide"[All
Fields]) OR "single nucleotide polymorphism"[All Fields] OR ("single"[All
Fields] AND "nucleotide"[All Fields] AND "polymorphism"[All Fields])) OR
"SNP"[All Fields] OR "SNPs"[All Fields] OR PSA[All Fields] OR "prostate
health index"[All Fields] OR PHI[All Fields] OR (4k[All Fields] AND
score[All Fields]) OR "kallikrein panel"[All Fields] OR PCA3[All Fields]
OR (TMPRSS2[All Fields] AND ERG[All Fields]) OR ERG[All Fields] OR
TMPRSS2[All Fields] OR ("biological markers"[MeSH Terms] OR
("biological"[All Fields] AND "markers"[All Fields]) OR "biological
markers"[All Fields] OR "biomarker"[All Fields]) OR ("biological
markers"[MeSH Terms] OR ("biological"[All Fields] AND "markers"[All
Fields]) OR "biological markers"[All Fields] OR "marker"[All Fields]) OR
("genetic testing"[MeSH Terms] OR ("genetic"[All Fields] AND "testing"[All
Fields]) OR "genetic testing"[All Fields] OR ("genetic"[All Fields] AND
"tests"[All Fields]) OR "genetic tests"[All Fields]) OR (("genomics"[MeSH
Terms] OR "genomics"[All Fields] OR "genomic"[All Fields] OR "genome"[MeSH
Terms] OR "genome"[All Fields]) AND tests[All Fields]) OR prolis[All
Fields] OR "cell cycle progression"[All Fields] OR "oncotype dx"[All
Fields])) AND (("prostatic neoplasms"[MeSH Terms] OR ("prostatic"[All
Fields] AND "neoplasms"[All Fields]) OR "prostatic neoplasms"[All Fields]
OR ("prostate"[All Fields] AND "cancer"[All Fields]) OR "prostate
cancer"[All Fields]) OR ("prostatic neoplasms"[MeSH Terms] OR
("prostatic"[All Fields] AND "neoplasms"[All Fields]) OR "prostatic
neoplasms"[All Fields] OR ("prostate"[All Fields] AND "cancers"[All
Fields]) OR "prostate cancers"[All Fields]) OR ("prostatic neoplasms"[MeSH
Terms] OR ("prostatic"[All Fields] AND "neoplasms"[All Fields]) OR
"prostatic neoplasms"[All Fields] OR ("prostatic"[All Fields] AND
"neoplasm"[All Fields]) OR "prostatic neoplasm"[All Fields]) OR
("prostatic neoplasms"[MeSH Terms] OR ("prostatic"[All Fields] AND
"neoplasms"[All Fields]) OR "prostatic neoplasms"[All Fields])) AND
(active surveillance[tiab] OR ("watchful waiting"[MeSH Terms] OR
("watchful"[All Fields] AND "waiting"[All Fields]) OR "watchful
waiting"[All Fields]) OR observation[tiab] OR expectant management[tiab]
OR ((insignificant[All Fields] OR indolent[All Fields]) AND
("neoplasms"[MeSH Terms] OR "neoplasms"[All Fields] OR "cancer"[All

```

Fields)))

b) EMBASE:

((((prostate cancer or prostate cancer or prostate cancers or (prostatic neoplasm\$ or prostate tumor)) and (risk assessment or risk assessment\$ or risk stratification or risk factor or risk factor\$ or risk or risk\$ or (prognosis or cancer prognosis or prognosis)) and (watchful waiting or observation or (insignificant adj2 cancer) or (indolent adj2 cancer) or expectant management or watchful waiting or active surveillance) and (neoplasm staging or cancer staging or (neoplasm grading or cancer grading) or tumor marker or biological tumor marker\$ or nomogram or nomogram\$ or prostate specific antigen or prostate-specific antigen or single nucleotide polymorphism\$ or single nucleotide polymorphism or SNP\$ or PSA or PCA3 or kallikrein panel or 4k score or PHI or prostate health index or TMPRSS2:ERG or ERG or TMPRSS2 or biological marker or biomarker\$ or marker\$ or genetic test\$ or genomic test\$ or cell cycle progression or oncotype dx or prolaris or cell cycle progression or! genetic screening)) not (letter or editorial))

b) Cochrane Central:

'prostate cancer OR prostate cancers OR prostatic neoplasm OR prostatic neoplasms in Title, Abstract, Keywords and risk stratification OR risk assessment OR risk factors OR prognosis OR risk in Title, Abstract, Keywords and neoplasm staging OR neoplasm grading OR biological tumor markers OR nomograms OR prostate-specific antigen OR single nucleotide polymorphism OR "SNP" OR "SNPs" OR PSA OR "prostate health index" OR PHI OR "4k score" OR "kallikrein panel" OR PCA3 OR ERG OR TMPRSS2 OR biomarker OR marker OR genetic tests OR genomic tests OR prolaris OR "cell cycle progression" OR "oncotype dx" in Title, Abstract, Keywords and "active surveillance" OR watchful waiting OR "observation" OR "expectant management" OR ((insignificant OR indolent) AND cancer) in Title, Abstract, Keywords in Trials



## Appendix 2: Characteristics included studies

| Authors and references | Yr of publication | Study design  | Institution/ AS cohort                                           | Population                                                                                                                                                              | Sample size |
|------------------------|-------------------|---------------|------------------------------------------------------------------|-------------------------------------------------------------------------------------------------------------------------------------------------------------------------|-------------|
| Tsenget al (5)         | 2010              | Prospective   | John Hopkins                                                     | Clinical stage T1c, PSA density $\leq 0.15$ ng/ml/cm <sup>3</sup> , GS $\leq 6$ , $\leq 2$ biopsy cores with cancer, maximum of 50% involvement of any core with cancer | 376         |
| Abernet al (8)         | 2013              | Retrospective | Duke Prostate Center Durham                                      | PSA <10 ng/ml, GS $\leq 6$ , and $\leq 33\%$ of cores with cancer on diagnostic biopsy                                                                                  | 145         |
| Iremashvili et al (9)  | 2012              | Prospective   | University of Miami                                              | GS<7, $\leq 2$ positive biopsy cores, $\leq 20\%$ tumor present in any core and clinical stage T1-T2a                                                                   | 249         |
| Sundiet al (10)        | 2014              | Prospective   | Johns Hopkins                                                    | Clinical stage $\leq$ T1, Gleason $\leq 6$ , PSA<10, PSA density <0.15, positive cores <3, percent cancer per core $\leq 50\%$                                          | 654         |
| Cohn et al (11)        | 2014              | Prospective   | University of Chicago                                            | Clinical stage $\leq$ T2a, GS $\leq 6$ , $\leq 3$ cores positive, maximum single core involvement <50%; total tumour volume $\leq 5\%$ on diagnostic biopsy             | 165         |
| Cullen et al (12)      | 2011              | Retrospective | Center for Prostate Disease Research (CPDR) multicenter database | Men diagnosed with CaP between 1989 and 2008 initially on AS for a minimum of 9 months with at least 24 months of follow-up                                             | 690         |
| Flechner et al (13)    | 2011              | Prospective   | REDEEM trial                                                     | Clinical stage T1c-T2a PCa, GS $\leq 6$ , PSA $\leq 10$ ng/mL. Entry biopsy of at least 10 cores had to be performed within 6 months of screening                       | 289         |
| Smit het al (14)       | 2009              | Retrospective | Single institution                                               | Low risk prostate cancer                                                                                                                                                | 71          |

|                      |      |               |                                                  |                                                                                                                                                                                                                                                                                  |      |
|----------------------|------|---------------|--------------------------------------------------|----------------------------------------------------------------------------------------------------------------------------------------------------------------------------------------------------------------------------------------------------------------------------------|------|
| Dall' Era et al (15) | 2008 | Prospective   | UCSF                                             | PSA <10 ng/mL, biopsy Gleason sum ≤ 6 with no pattern 4 or 5, cancer involvement of <33% of biopsy cores, and clinical stage T1/T2a tumor.                                                                                                                                       | 321  |
| Patel et al (16)     | 2014 | Prospective   | Johns Hopkins                                    | Stage T1c disease; PSAD<0.15; GS ≤ 6, ≤2 biopsy cores and 50% or less involvement of any core with cancer                                                                                                                                                                        | 275  |
| Shapley et al (17)   | 2009 | Prospective   | Health Professionals Followup Study              | Men diagnosed with PC between 1986 and 2007 who opted for deferred treatment<br>(no treatment for at least 1 year after the date of PCa diagnosis)                                                                                                                               | 342  |
| Lin et al (18)       | 2013 | Prospective   | Canary Prostate Active Surveillance Study (PASS) | Histologically confirmed adenocarcinoma of the prostate, ECOG performance status of 0 or 1, clinical T1 and T2 disease, no previous treatment for PCa including hormonal therapy, radiotherapy surgery, or chemotherapy, and the willingness to undergo serial prostate biopsies | 387  |
| Bul et al (19)       | 2013 | Prospective   | ERSPC (PRIAS)                                    | Clinical stage T1/T2 PCa, PSA≤ 10 ng/ml, PSAD <0.2 ng/ml per milliliter, 1 or 2 positive biopsy cores, and GS≤ 6                                                                                                                                                                 | 2494 |
| Klotz et al (20)     | 2010 | Prospective   | University of Toronto                            | GS≤6, PSA≤10 ng/mL (less stringent for >70 initially)                                                                                                                                                                                                                            | 450  |
| Sternberg et al (21) | 2014 | Retrospective | MSKCC                                            | cT1 or cT2a, PSA<10, GS≤6, ≤3 positive biopsy cores and ≤50% involvement of any single core                                                                                                                                                                                      | 680  |
| Whitson et al (22)   | 2011 | Prospective   | UCSF                                             | PSA<10 ng/ml, clinical stage T1 or T2, GS≤6, 33% or fewer of at least 6 cores positive, no single core>50%                                                                                                                                                                       | 241  |
| Zhang et al (23)     | 2006 | Prospective   | Sunnybrook, Toronto                              | T1b-T2b, GS ≤7, PSA ≤15                                                                                                                                                                                                                                                          | 231  |
| Berg et al (24)      | 2014 | Prospective   | University of Copenhagen                         | PSA≤10 ng/ml, clinical tumour stage ≤cT2a; GS ≤6; ≤3 cores with cancer; ≤50% tumor in any single core (except n=57 did not meet criteria)                                                                                                                                        | 265  |
| Bul                  | 2012 | Prospective   | ERSPC                                            | Clinical stage ≤ T2, PSA≤ 10 ng/ml, PSA density <0.2                                                                                                                                                                                                                             | 757  |

|                                       |      |                   |                                               |                                                                                                                                                                         |     |
|---------------------------------------|------|-------------------|-----------------------------------------------|-------------------------------------------------------------------------------------------------------------------------------------------------------------------------|-----|
| et al<br>(25)                         |      | ve                | (PRIAS)                                       | ng/ml per milliliter, 1 or 2 positive biopsy cores, GS≤6                                                                                                                |     |
| Cary<br>et al<br>(26)                 | 2013 | Prospecti<br>ve   | UCSF                                          | PSA ≤10 ng/ml, clinical stage T1 or T2, biopsy GS 6, <33% positive cores, and <50% tumor in any single core                                                             | 465 |
| Egge<br>ner<br>et al<br>(27)          | 2009 | Retrospec<br>tive | Multicent<br>er study                         | Age ≤ 75, PSA ≤10, GS ≤6, clinical stage T1-T2a, 3 or less positive biopsies, repeat biopsy before surveillance                                                         | 262 |
| Hira<br>ma<br>et al<br>(28)           | 2014 | Prospecti<br>ve   | Multi-<br>institution<br>al cohort<br>(Japan) | stage T1cN0M0; age 50–80; PSA ≤ 20 ng/ml; 1 or 2 positive cores per 6–12 systematic biopsy cores; GS ≤6; maximum cancer involvement in positive cores of ≤50 %          | 67  |
| Klotz<br>et al<br>(29)                | 2004 | Prospecti<br>ve   | Universit<br>y of<br>Toronto                  | ≤70 yr: GS≤6, PSA ≤10. >70 yr: GS ≤3+4, PSA<15                                                                                                                          | 299 |
| Mak<br>arov<br>et al<br>(30)          | 2009 | Prospecti<br>ve   | Johns<br>Hopkins                              | Epstein criteria (T1c, PSAD ≤0.15, GS <7, <3 positive cores, ≤50% core involvement)                                                                                     | 71  |
| Solo<br>way<br>et al<br>(31)          | 2008 | Prospecti<br>ve   | Universit<br>y of<br>Miami                    | GS≤ 6, PSA ≤15 ng/mL, stage ≤T2, low-volume disease (≤50% of 2 biopsy cores) and >12 months of follow-up                                                                | 99  |
| Venk<br>itara<br>man<br>et al<br>(32) | 2007 | Prospecti<br>ve   | Royal<br>Marsden<br>Hospital                  | T1/2a, PSA < 15, GS ≤ 3+4, ≤50% positive cores                                                                                                                          | 119 |
| Corn<br>u et<br>al<br>(33)            | 2013 | Retrospec<br>tive | PASS                                          | Men either having biopsy for elevated PSA >3 (55% of population), or AS candidates undergoing restaging biopsy (T1c, GS <7, PSA <10, no ECE on MRI) (45% of population) | 291 |
| Ishar<br>wal<br>et al<br>(34)         | 2010 | Retrospec<br>tive | Johns<br>Hopkins                              | T1c, PSAD ≤0.15 ng/mL/cm <sup>3</sup> , GS<7, ≤2 cores involved with cancer, ≤50% of any core involved with cancer                                                      | 71  |
| van<br>den<br>Berg<br>h et            | 2010 | Prospecti<br>ve   | ERSPC<br>(PRIAS)                              | Asymptomatic T1c/T2 PCa, PSA≤10.0 ng/mL, PSA density of <0.2 ng/mL/mL, GS≤3+3=6, 1 or 2 positive biopsy cores                                                           | 500 |

|                              |      |               |                                              |                                                                                                                                                                                                                                                                            |     |
|------------------------------|------|---------------|----------------------------------------------|----------------------------------------------------------------------------------------------------------------------------------------------------------------------------------------------------------------------------------------------------------------------------|-----|
| al<br>(35)                   |      |               |                                              |                                                                                                                                                                                                                                                                            |     |
| San Francisco et al<br>(36)  | 2011 | Prospective   | Multi-institutional cohort                   | Clinically localized disease (T1c-T2c), GS $\leq$ 6 with no pattern 4, <3 cores positive for cancer, $\leq$ 50% involvement in any core                                                                                                                                    | 120 |
| Valleri et al<br>(37)        | 2010 | Retrospective | Multi-institutional cohort (France)          | PSA<10, cTstage <T2b, GS <7, positive cores <3, length of PC/core <3 mm                                                                                                                                                                                                    | 60  |
| Burton et al<br>(38)         | 2012 | Prospective   | ProtecT trial                                | Clinical stage $\leq$ T2 PCa, PSA<20 ng/mL (randomized to 3 trial arms: radical prostatectomy, radical radiotherapy, or active monitoring with regular PSA measurements)                                                                                                   | 404 |
| Goh et al<br>(39)            | 2013 | Retrospective | Royal Marsden Hospital                       | Histologically confirmed PCa, stage T1/2a, N0, M0, Gleason score 3+3, PSA <15 ng/mL with cancer present in <50% of the total number of biopsy cores, ages 50-80, fit for radical treatment but chose AS for initial management. GS 3+4 only allowed if patients > 65 years | 471 |
| Mukerji et al<br>(40)        | 2010 | Retrospective | British cohort with low screening penetrance | T1c-T2a initially managed with AS                                                                                                                                                                                                                                          | 85  |
| van den Berghe et al<br>(41) | 2009 | Retrospective | ERSPC (PRIAS)                                | Screen-detected GS 7                                                                                                                                                                                                                                                       | 50  |
| Venkitaraman et al<br>(42)   | 2008 | Prospective   | Royal Marsden Hospital                       | Clinical stage T1/T2a, N0/Nx, M0/Mx adenocarcinoma of the prostate with PSA<15 ng/mL, GS $\leq$ 7 with primary grade $\leq$ 3, and less than half the biopsy cores positive                                                                                                | 237 |
| Jhavar et al<br>(43)         | 2009 | Prospective   | Royal Marsden hospital                       | PSA <15, clinical stage T1/T2a, GS $\leq$ 3+4, $\leq$ 50% positive cores                                                                                                                                                                                                   | 60  |

|                        |      |               |                                 |                                                                                                                                                                                                                      |     |
|------------------------|------|---------------|---------------------------------|----------------------------------------------------------------------------------------------------------------------------------------------------------------------------------------------------------------------|-----|
| van As et al (44)      | 2008 | Prospective   | Royal Marsden Hospital          | Clinical stage T1–T2a, N0–Nx, M0–Mx adenocarcinoma of the prostate with serum PSA < 15 ng/ml, Gleason score $\leq 7$ , primary Gleason grade $\leq 3$ , and % positive biopsy cores $\leq 50\%$ .                    | 326 |
| Iremashvili et al (45) | 2013 | Prospective   | University of Miami             | GS<7, $\leq 2$ positive biopsy cores, $\leq 20\%$ tumor present in any core and clinical stage T1–T2a, PSA <15 with at least 2 surveillance biopsies                                                                 | 205 |
| Iremashvili et al (46) | 2013 | Prospective   | University of Miami             | GS<7, $\leq 2$ positive biopsy cores, $\leq 20\%$ tumor present in any core, and clinical stage T1–T2a                                                                                                               | 161 |
| Ng et al (47)          | 2008 | Prospective   | Royal Marsden Hospital          | PSA <15, clinical stage T1/T2a, GS $\leq 3+4$ , $\leq 50\%$ positive cores                                                                                                                                           | 199 |
| Adamy et al (48)       | 2011 | Retrospective | MSKCC                           | PSA<10 ng/ml, no GS 4 or 5, clinical stage T1–T2a, $\leq 3$ positive biopsy cores (minimum 10), no biopsy core containing >50% cancer involvement and confirmatory biopsy to reassess eligibility before starting AS | 238 |
| Yee et al (49)         | 2010 | Prospective   | MSKCC                           | PSA < 10ng/ml, Gleason score 6 or less, cT2a or less, 3 or less positive cores and no more than 50% of a core involved by tumor.                                                                                     | 297 |
| Fromont et al (50)     | 2011 | Prospective   | Multi-institutional cohort      | Age $\leq 75$ years, clinical stage T1c or T2a, Gleason $\leq 6$ , PSA<10 ng/ml, 2 (out of 12) or fewer biopsy cores with cancer, and each cancer foci 3 mm or less                                                  | 155 |
| Soloway et al (51)     | 2010 | Prospective   | University of Miami             | GS $\leq 6$ , PSA $\leq 10$ , 1 or 2 positive cores with $\leq 20\%$ tumor in each core                                                                                                                              | 230 |
| Umbhr et al (52)       | 2014 | Prospective   | Johns Hopkins                   | Clinical stage T1c, PSAD <0.15, GS 6, no Gleason pattern 4 or 5, 2 biopsy cores with cancer, maximum of 50% involvement of any core with cancer                                                                      | 640 |
| Barayan et al (53)     | 2014 | Retrospective | McGill University Health Center | <3 positive cores; GS $\leq 3+4$ ; <50% of cancer on any involved biopsy core                                                                                                                                        | 155 |
| Welt                   | 2014 | Retrospective | UCSF                            | PSA<10, <cT3, GS $\leq 6$ , <33% of bx cores positive,                                                                                                                                                               | 764 |



|                        |      |             |                                    |                                                                                                                                                                                                                                                                                                                                                      |                              |
|------------------------|------|-------------|------------------------------------|------------------------------------------------------------------------------------------------------------------------------------------------------------------------------------------------------------------------------------------------------------------------------------------------------------------------------------------------------|------------------------------|
| y et al (54)           |      | Prospective |                                    | <50% of any single biopsy core positive. Men who did not meet these criteria but still elected AS were followed as well                                                                                                                                                                                                                              |                              |
| Tosolian et al (55)    | 2012 | Prospective | Johns Hopkins                      | Clinical stage T1c, PSA density <0.15 ng/ml/cm <sup>3</sup> , GS≤6, ≤2 biopsy cores with cancer, maximum of 50% involvement of any core with cancer                                                                                                                                                                                                  | 167                          |
| Komisarenko et al (56) | 2014 | Prospective | University of Toronto              | GS 6                                                                                                                                                                                                                                                                                                                                                 | 555                          |
| Loblaw et al (57)      | 2010 | Prospective | University of Toronto              | Stage T1b-T2b N0M0, GS≤7, PSA≤15 ng/ml                                                                                                                                                                                                                                                                                                               | 305                          |
| Kakehi (58)            | 2008 | Prospective | Multi-institutional cohort (Japan) | Stage T1cN0M0, age 50–80, PSA≤20 ng/ml, 1 or 2 positive cores per 6–12 systematic biopsy cores, GS ≤6, cancer involvement in positive core ≤50%                                                                                                                                                                                                      | 118                          |
| Ross et al (59)        | 2010 | Prospective | Johns Hopkins                      | PSA density < 0.15 ng/mL/cm <sup>3</sup> , GS≤6 with no pattern ≥4, involving ≤2 cores with cancer, and ≤ 50% involvement of any core by cancer                                                                                                                                                                                                      | 290                          |
| Khatami et al (60)     | 2007 | Prospective | ERSPC                              | The reasons for choosing AS were comorbidity, small-volume cancers in biopsies or patient's desire (or combination of these)). Small-volume cancers in biopsies were classified as 1 or 2 adjacent cores with a total core cancer length of less than 2 mm and where rebiopsies of the area did not reveal more cancer (mixed cohort with AS and WW) | 270                          |
| Iremashvili et al (61) | 2013 | Prospective | University of Miami                | GS<7, ≤2 positive biopsy cores, ≤20% tumor present in any core, and clinical stage T1-T2a                                                                                                                                                                                                                                                            | 250                          |
| Krakovsky et al (62)   | 2010 | Prospective | University of Toronto              | PSA ≤10, GS ≤ 6 and T1c/T2a (Epstein criteria for men <55 years; for 1st 5 years also included 3+4=7 and PSA <15 for men >70 years)                                                                                                                                                                                                                  | 453 (5 for further analysis) |
| Pujara et al           | 2010 | Prospective | Cleveland Clinic                   | Low risk disease                                                                                                                                                                                                                                                                                                                                     | 99                           |

---

(63)

---

|                          |      |             |                        |                                                                                                                                                     |                                                        |
|--------------------------|------|-------------|------------------------|-----------------------------------------------------------------------------------------------------------------------------------------------------|--------------------------------------------------------|
| Toson et al (66)         | 2010 | Prospective | Johns Hopkins          | Clinical stage T1c, PSA density <0.15 ng/ml/cm <sup>3</sup> , GS≤6, ≤2 biopsy cores with cancer, maximum of 50% involvement of any core with cancer | 294                                                    |
| Venkitaraman et al (67)  | 2008 | Prospective | Royal Marsden Hospital | Patients with untreated, localised prostatic adenocarcinoma on a prospective clinical study of AS                                                   | 191                                                    |
| Tausch et al (69)        | 2009 | Prospective | CPDR                   | Men with very low and low risk disease                                                                                                              | 2058 (Including men who had surgery, radiation and AS) |
| van den Bergh et al (70) | 2009 | Prospective | ERSPC (PRIAS)          | PRIAS                                                                                                                                               | 199                                                    |

---

\*ERSPC= European Randomized Study of Screening for PCa; UCSF=University of California, San Francisco; MSKCC=Memorial Sloan-Kettering Cancer Center

**Appendix 3: Summary statistical significance of clinic-pathologic variables and biomarkers for risk stratification\***

| <b>Clinic-pathologic variables and biomarkers</b> | <b>Statistical significance</b>                                                                                     |
|---------------------------------------------------|---------------------------------------------------------------------------------------------------------------------|
| <b>Patient factors</b>                            |                                                                                                                     |
| <i>Race</i>                                       | Sig: (8-12)<br>Not sig: (10, 13-18)                                                                                 |
| <i>Age</i>                                        | Sig: (12, 13, 17, 19-23)<br>Not sig: (5, 8, 9, 14-18, 24-35)                                                        |
| <i>Family history</i>                             | Sig: (13, 36, 37)<br>Not sig: (9, 18, 33, 38, 39)                                                                   |
| <i>BMI/ Metabolic syndrome</i>                    | Sig: (11)<br>Not sig: (9, 10, 17, 38)                                                                               |
| <b>Biopsy factors</b>                             |                                                                                                                     |
| <i>Prostate volume</i>                            | Sig: (9, 13, 22, 28)<br>Not sig: (10, 27, 28, 30, 35, 44)                                                           |
| <i>Gleason score</i>                              | Sig: (12, 15, 17, 20, 23, 38, 40, 41, 43)<br>Not sig: (17, 24, 29, 31, 32, 42, 44)                                  |
| <i>Extent of cancer on initial biopsy</i>         | Sig: (5, 9, 11, 14, 19, 21, 24, 25, 27, 32, 35, 40, 45-47)<br>Not sig: (11, 24, 26, 28, 30, 34, 42, 44, 45, 48, 49) |
| <i>Restaging biopsy data</i>                      | Sig: (26, 27, 45, 46, 48, 50, 51, 56)                                                                               |
| <b>PSA derivatives</b>                            |                                                                                                                     |
| <i>PSA</i>                                        | Sig: (8, 13, 17-19, 21, 23, 29, 52)<br>Not sig: (5, 9, 10, 14, 17, 20, 25, 27, 29-32, 34, 35, 42-44, 48, 55, 60)    |
| <i>PSADT</i>                                      | Sig: (12, 19, 20, 23, 25, 29, 31, 47, 60)<br>Not sig: (22, 35, 51, 58, 59, 61)                                      |
| <i>PSAV</i>                                       | Sig: (14, 36, 47, 59, 61)<br>Not sig: (13, 15, 16, 32)                                                              |
| <i>PSAV risk count</i>                            | Sig: (16)                                                                                                           |
| <i>PSA density</i>                                | Sig: (5, 9, 11, 15, 19, 25, 26, 32, 33, 36, 42, 43, 45, 47, 53, 54)<br>Not sig: (5, 16, 24, 30, 34, 44, 48)         |
| <i>%ofPSA</i>                                     | Sig: (5, 29, 44, 55)<br>Not sig: (5, 30, 34, 60)                                                                    |
| <i>%-2proPSA/ phi</i>                             | Sig: (28, 30, 34, 36)                                                                                               |
| <b>Genetics/ genomics and other factors</b>       |                                                                                                                     |
| <i>Urinary PCA3 and TMPRSS2:ERG</i>               | Sig: (33)<br>Not sig: (18, 66)                                                                                      |
| <i>ERG in tissue</i>                              | Sig: (24)                                                                                                           |
| <i>DNA content</i>                                | Sig: (34)                                                                                                           |

---

---

|                               |                   |
|-------------------------------|-------------------|
| <i>Ki-67</i>                  | Sig: (43)         |
| <i>Urinary phytoestrogens</i> | Not sig: (67)     |
| <i>SNPs</i>                   | Not sig: (33, 39) |

---

\*Endpoints of evaluated studies ranged from PSA kinetics to reclassification by volume and/or grade on repeat biopsy, time to treatment, and mortality. Some studies evaluated multiple endpoints so may be included multiple times.
